# Supplementary material
Source: PubMed Central journal article supplement (PMC7269456)
Supplement: NIHMS971639-supplement-1.pdf [file NIHMS971639-supplement-1.pdf]

**Supplemental Table 1. Primer sequences for real-time qPCR.**

| Gene         | Forward Primer                 | Reverse Primer                 |
|--------------|--------------------------------|--------------------------------|
| Sat1         | 5'-CAGTGGAGCGCCAGAATAGAA-3'    | 5'-CCTGTGCCCTTCAAGGAG-3'       |
| Ucp1         | 5'-AGGCTTCCAGTACCATTAGGT-3'    | 5'-CTGAGTGAGGCAAAGCTGATTT-3'   |
| Cidea        | 5'-TGACATTCATGGGATTGCAGAC-3'   | 5'-GGCCAGTTGTGATGACTAAGAC-3'   |
| Pgc1a        | 5'-TATGGAGTGACATAGAGTGTGCT-3'  | 5'-CCACTTCAATCCACCCAGAAAG-3'   |
| Pgc1b        | 5'-TCCTGTAAAAGCCCGGAGTAT-3'    | 5'-GCTCTGGTAGGGGCAGTGA-3'      |
| Cox7a1       | 5'-GCTCTGGTCCGGTCTTTTAGC-3'    | 5'-GTACTGGGAGGTCATTGTCCG-3'    |
| Cox8b        | 5'-TGTGGGGATCTCAGCCATAGT-3'    | 5'-AGTGGGCTAAGACCCATCCTG-3'    |
| Pparg        | 5'-TCCTGTAAAAGCCCGGAGTAT-3'    | 5'-GCTCTGGTAGGGGCAGTGA-3'      |
| Acox1        | 5'-CAGGAAGAGCAAGGAAGTGG-3'     | 5'-CCTTTCTGGCTGATCCCATA-3'     |
| Cpt1         | 5'-CCAGGCTACAGTGGGACATT-3'     | 5'-GAACTTGCCCATGTCCTTGT-3'     |
| Cd36         | 5'-AACTTGTGGCCTTGCACCT-3'      | 5'-GCAGAATCAAGGGAGAGCAC-3'     |
| LPL          | 5'-GCCAGCAACATTATCCAGT-3'      | 5'-GGTCAGACTTCTGCTACGC-3'      |
| Acc1         | 5'-TGTACAAGCAGTGTGGGCTGGCT-3'  | 5'-CCACATGGCCTGGCTTGGAGGG-3'   |
| Fas          | 5'-GCTGCGGAAACTTCAGGAAAT-3'    | 5'-AGAGACGTGTCACCTCTGGACTT-3'  |
| Pdk4         | AAGATGCTCTTGCGACCAGTAT         | 5'-GAAGGTGTGAAGGAACGTACA-3'    |
| Cd14         | 5'-CTCTGTCCTTAAAGCGGCTTAC-3'   | 5'-GTTGCGGAGGTTCAAGATGTT-3'    |
| Tnf-a        | 5'-ACCCTGGTATGAGCCCATATAC-3'   | 5'-ACACCCATTCCCTTACAGAG-3'     |
| Ccl8         | 5'-TCTACGCAGTGCTTCTTTGCC-3'    | 5'-AAGGGGGATCTTCAGCTTTAGTA-3'  |
| Foxp3        | 5'-CCCATCCCCAGGAGTCTTG-3'      | 5'-ACCATGACTAGGGGCACTGTA-3'    |
| Cxcr6        | 5'-GAGTCAGCTCTGTACGATGGG-3'    | 5'-TCCTTGAACCTTAGGAAGCGTTT-3'  |
| Cxcr3        | 5'-TACCTTGAGGTTAGTGAACGTCA-3'  | 5'-CGCTCTCGTTTTCCCATATAATC-3'  |
| IL-1 $\beta$ | 5'-ATGAGAGCATCCAGCTTCAA-3'     | 5'-TGAAGGAAAAGAAGGTGCTC-3'     |
| IL-10        | 5'-CCCATTCCCTCGTCACGATCTC-3'   | 5'-TCAGACTGGTTTGGGATAGGTTT-3'  |
| IL-6         | 5'-GAGGATAACCACTCCCAACAGACC-3' | 5'-AAGTGCATCATCGTTGTTCATACA-3' |
| Mcp-1        | 5'-GCATCTGCCCTAAGGTCTTCA-3'    | 5'-TGCTTGAGGTGGTTGTGGAA-3'     |
| ODC          | 5'-GACGAGTTTGACTGCCACATC-3'    | 5'-CGCAACATAGAACGCATCCTT-3'    |
| Apaox        | 5'-CTTCGGTGGTGTAGTGGAGC-3'     | 5'-TCCGATAATTCTTTCTCCCCAG-3'   |
| Nrf2         | 5'-ATGATGGACTTGGAGTTGCC-3'     | 5'-TCCTGTTCTTCTGGAGTTG-3'      |
| Tbp          | 5'-CCCTATCACTCCTGCCACAC-3'     | 5'-ACGAAGTCAATGGTCTTTAGG-3'    |

**Supplemental Table 2. Significantly reduced clusters in adipose tissue of SAT1-aKO mice by DAVID analysis**

| Cluster              | Term               | Enrichment Score | Count | %    | PValue   | List Total | Fold Enrichment | FDR       |
|----------------------|--------------------|------------------|-------|------|----------|------------|-----------------|-----------|
| Annotation Cluster 1 | Immunity           | 5.17             | 35    | 5.6  | 1.89E-09 | 592        | 3.34            | 2.55E-06  |
| Annotation Cluster 2 | Mitochondrion      | 5                | 61    | 9.8  | 1.37E-08 | 592        | 2.21            | 1.86E-05  |
| Annotation Cluster 3 | Nucleotide-binding | 3.33             | 76    | 12.3 | 1.50E-05 | 592        | 1.66            | 0.0202324 |
| Annotation Cluster 4 | Ribonucleoprotein  | 2.98             | 25    | 4.0  | 2.08E-06 | 592        | 3.11            | 0.0028139 |
| Annotation Cluster 5 | Disulfide bond     | 2.88             | 146   | 23.5 | 9.96E-13 | 592        | 1.79            | 1.35E-09  |
| Annotation Cluster 6 | RNA-binding        | 2.51             | 39    | 6.3  | 5.31E-07 | 592        | 2.49            | 7.17E-04  |

**Supplemental Table 3. Top 10 biological processes over-represented in reduced genes from adipose tissue of SAT1-aKO mice by Panther GO biological process analysis**

| GO biological process complete                         | Fold Enrichment | Raw P-value | FDR      |
|--------------------------------------------------------|-----------------|-------------|----------|
| immune system process (GO:0002376)                     | 2.39            | 8.37E-20    | 1.29E-15 |
| regulation of immune system process (GO:0002682)       | 2.61            | 4.85E-16    | 3.73E-12 |
| positive regulation of biological process (GO:0048518) | 1.61            | 1.06E-15    | 5.41E-12 |
| positive regulation of cellular process (GO:0048522)   | 1.64            | 8.55E-15    | 3.28E-11 |
| immune response (GO:0006955)                           | 2.6             | 1.81E-14    | 5.55E-11 |
| sensory perception of chemical stimulus (GO:0007606)   | 0.05            | 3.55E-14    | 9.10E-11 |
| cellular process (GO:0009987)                          | 1.23            | 1.03E-13    | 1.98E-10 |
| cellular response to chemical stimulus (GO:0070887)    | 2.09            | 9.28E-14    | 2.04E-10 |
| response to organic substance (GO:0010033)             | 2               | 1.45E-13    | 2.48E-10 |
| cellular response to organic substance (GO:0071310)    | 2.22            | 3.27E-13    | 5.03E-10 |

**Supplemental Table 4. Significantly increased clusters in adipose tissue of SAT1-aKO mice by DAVID analysis**

| Cluster              | Term                  | Enrichment Score | Count | %    | PValue   | List Total | Fold Enrichment | FDR        |
|----------------------|-----------------------|------------------|-------|------|----------|------------|-----------------|------------|
| Annotation Cluster 1 | Membrane              | 7.25             | 426   | 46.3 | 6.86E-09 | 896        | 1.24            | 9.37E-06   |
| Annotation Cluster 2 | Glycoprotein          | 7.24             | 251   | 27.3 | 7.57E-18 | 896        | 1.67            | 1.03E-14   |
| Annotation Cluster 3 | Endoplasmic reticulum | 5.11             | 72    | 7.8  | 1.14E-06 | 896        | 1.83            | 0.00156506 |
| Annotation Cluster 4 | Metal-binding         | 3.52             | 185   | 20.1 | 2.75E-06 | 896        | 1.38            | 0.00375275 |
| Annotation Cluster 5 | Lysosome              | 3.23             | 19    | 2.1  | 8.97E-07 | 896        | 4.01            | 0.00116877 |

**Supplemental Table 5. Reduced immunity-related genes in inguinal white adipose tissue of SAT1-aKO mice**

| Gene ID                                | Description                                                                                   | log2FC | pvalue  |
|----------------------------------------|-----------------------------------------------------------------------------------------------|--------|---------|
| <b>Chemokines and cytokines</b>        |                                                                                               |        |         |
| <b>Ccl21a</b>                          | chemokine (C-C motif) ligand 21A (serine) [Source:MGI Symbol;Acc:MGI:1349183]                 | -0.48  | 0.0372  |
| <b>Ccl22</b>                           | chemokine (C-C motif) ligand 22 [Source:MGI Symbol;Acc:MGI:1306779]                           | -0.46  | 0.0503  |
| <b>Ccl5</b>                            | chemokine (C-C motif) ligand 5 [Source:MGI Symbol;Acc:MGI:98262]                              | -0.61  | 0.0084  |
| <b>Ccl8</b>                            | chemokine (C-C motif) ligand 8 [Source:MGI Symbol;Acc:MGI:101878]                             | -0.63  | 0.0088  |
| <b>Cxcl13</b>                          | chemokine (C-X-C motif) ligand 13 [Source:MGI Symbol;Acc:MGI:1888499]                         | -0.41  | 0.0330  |
| <b>Cxcl14</b>                          | chemokine (C-X-C motif) ligand 14 [Source:MGI Symbol;Acc:MGI:1888514]                         | -0.44  | 0.0242  |
| <b>Cxcl16</b>                          | chemokine (C-X-C motif) ligand 16 [Source:MGI Symbol;Acc:MGI:1932682]                         | -0.45  | 0.0337  |
| <b>Tnf</b>                             | tumor necrosis factor [Source:MGI Symbol;Acc:MGI:104798]                                      | -0.5   | 0.03599 |
| <b>Receptors</b>                       |                                                                                               |        |         |
| <b>Ccr10</b>                           | chemokine (C-C motif) receptor 10 [Source:MGI Symbol;Acc:MGI:1096320]                         | -0.56  | 0.0188  |
| <b>Ccr7</b>                            | chemokine (C-C motif) receptor 7 [Source:MGI Symbol;Acc:MGI:103011]                           | -0.52  | 0.0250  |
| <b>Cx3cr1</b>                          | chemokine (C-X3-C motif) receptor 1 [Source:MGI Symbol;Acc:MGI:1333815]                       | -0.64  | 0.0074  |
| <b>Cxcr3</b>                           | chemokine (C-X-C motif) receptor 3 [Source:MGI Symbol;Acc:MGI:1277207]                        | -0.63  | 0.0052  |
| <b>Cxcr4</b>                           | chemokine (C-X-C motif) receptor 4 [Source:MGI Symbol;Acc:MGI:109563]                         | -0.48  | 0.0296  |
| <b>Cxcr6</b>                           | chemokine (C-X-C motif) receptor 6 [Source:MGI Symbol;Acc:MGI:1934582]                        | -0.72  | 0.0016  |
| <b>Il12rb1</b>                         | interleukin 12 receptor, beta 1 [Source:MGI Symbol;Acc:MGI:104579]                            | -0.47  | 0.0397  |
| <b>Il1r2</b>                           | interleukin 1 receptor, type II [Source:MGI Symbol;Acc:MGI:96546]                             | -0.47  | 0.0491  |
| <b>Ifnlr1</b>                          | interferon lambda receptor 1 [Source:MGI Symbol;Acc:MGI:2429859]                              | -0.47  | 0.0495  |
| <b>Il12rb1</b>                         | interleukin 12 receptor, beta 1 [Source:MGI Symbol;Acc:MGI:104579]                            | -0.47  | 0.0397  |
| <b>Il1r2</b>                           | interleukin 1 receptor, type II [Source:MGI Symbol;Acc:MGI:96546]                             | -0.47  | 0.0491  |
| <b>Il12rb2</b>                         | interleukin 12 receptor, beta 2 [Source:MGI Symbol;Acc:MGI:1270861]                           | -0.51  | 0.0307  |
| <b>Il2rg</b>                           | interleukin 2 receptor, gamma chain [Source:MGI Symbol;Acc:MGI:96551]                         | -0.51  | 0.0288  |
| <b>Il7r</b>                            | interleukin 7 receptor [Source:MGI Symbol;Acc:MGI:96562]                                      | -0.49  | 0.0385  |
| <b>Il12rb1</b>                         | interleukin 12 receptor, beta 1 [Source:MGI Symbol;Acc:MGI:104579]                            | -0.47  | 0.0397  |
| <b>Il1r2</b>                           | interleukin 1 receptor, type II [Source:MGI Symbol;Acc:MGI:96546]                             | -0.47  | 0.0491  |
| <b>Il10ra</b>                          | interleukin 10 receptor, alpha [Source:MGI Symbol;Acc:MGI:96538]                              | -0.41  | 0.0478  |
| <b>Il20rb</b>                          | interleukin 20 receptor beta [Source:MGI Symbol;Acc:MGI:2143266]                              | -0.4   | 0.0178  |
| <b>Il20rb</b>                          | interleukin 20 receptor beta [Source:MGI Symbol;Acc:MGI:2143266]                              | -0.4   | 0.0178  |
| <b>Il2ra</b>                           | interleukin 2 receptor, alpha chain [Source:MGI Symbol;Acc:MGI:96549]                         | -0.39  | 0.0499  |
| <b>Il17ra</b>                          | interleukin 17 receptor A [Source:MGI Symbol;Acc:MGI:107399]                                  | -0.32  | 0.0500  |
| <b>Ifnlr1</b>                          | interferon lambda receptor 1 [Source:MGI Symbol;Acc:MGI:2429859]                              | -0.47  | 0.0495  |
| <b>Cluster of differentiation (CD)</b> |                                                                                               |        |         |
| <b>Cd14</b>                            | CD14 antigen [Source:MGI Symbol;Acc:MGI:88318]                                                | -0.79  | 0.0001  |
| <b>Cd209e</b>                          | CD209e antigen [Source:MGI Symbol;Acc:MGI:2157948]                                            | -0.46  | 0.0473  |
| <b>Cd244</b>                           | CD244 natural killer cell receptor 2B4 [Source:MGI Symbol;Acc:MGI:109294]                     | -0.59  | 0.0124  |
| <b>Cd300e</b>                          | CD300E molecule [Source:MGI Symbol;Acc:MGI:2387602]                                           | -0.58  | 0.0045  |
| <b>Cd300ld</b>                         | CD300 molecule like family member d [Source:MGI Symbol;Acc:MGI:2442358]                       | -0.34  | 0.0520  |
| <b>Cd300lf</b>                         | CD300 molecule like family member F [Source:MGI Symbol;Acc:MGI:2442359]                       | -1.01  | 0.0000  |
| <b>Cd38</b>                            | CD38 antigen [Source:MGI Symbol;Acc:MGI:107474]                                               | -0.39  | 0.0426  |
| <b>Cd3d</b>                            | CD3 antigen, delta polypeptide [Source:MGI Symbol;Acc:MGI:88331]                              | -0.48  | 0.0340  |
| <b>Cd3e</b>                            | CD3 antigen, epsilon polypeptide [Source:MGI Symbol;Acc:MGI:88332]                            | -0.46  | 0.0469  |
| <b>Cd3g</b>                            | CD3 antigen, gamma polypeptide [Source:MGI Symbol;Acc:MGI:88333]                              | -0.46  | 0.0521  |
| <b>Cd4</b>                             | CD4 antigen [Source:MGI Symbol;Acc:MGI:88335]                                                 | -0.52  | 0.0276  |
| <b>Cd5</b>                             | CD5 antigen [Source:MGI Symbol;Acc:MGI:88340]                                                 | -0.47  | 0.0505  |
| <b>Cd53</b>                            | CD53 antigen [Source:MGI Symbol;Acc:MGI:88341]                                                | -0.46  | 0.0312  |
| <b>Cd7</b>                             | CD7 antigen [Source:MGI Symbol;Acc:MGI:88344]                                                 | -0.62  | 0.0077  |
| <b>Cd74</b>                            | CD74 antigen [Source:MGI Symbol;Acc:MGI:96534]                                                | -0.44  | 0.0512  |
| <b>Cd83</b>                            | CD83 antigen [Source:MGI Symbol;Acc:MGI:1328316]                                              | -0.66  | 0.0032  |
| <b>Cd96</b>                            | CD96 antigen [Source:MGI Symbol;Acc:MGI:1934368]                                              | -0.51  | 0.0321  |
| <b>Transcription factors</b>           |                                                                                               |        |         |
| <b>Foxp3</b>                           | forkhead box P3 [Source:MGI Symbol;Acc:MGI:1891436]                                           | -0.77  | 0.0009  |
| <b>Gata3</b>                           | GATA binding protein 3 [Source:MGI Symbol;Acc:MGI:95663]                                      | -0.62  | 0.0079  |
| <b>Others</b>                          |                                                                                               |        |         |
| <b>Ticam1</b>                          | toll-like receptor adaptor molecule 1 [Source:MGI Symbol;Acc:MGI:2147032]                     | -0.41  | 0.0157  |
| <b>Ifit1</b>                           | interferon-induced protein with tetratricopeptide repeats 1 [Source:MGI Symbol;Acc:MGI:96885] | -0.47  | 0.0116  |
| <b>Ly9</b>                             | lymphocyte antigen 9 [Source:MGI Symbol;Acc:MGI:96885]                                        | -0.47  | 0.0424  |
| <b>Ifit1</b>                           | interferon-induced protein with tetratricopeptide repeats 1 [Source:MGI Symbol;Acc:MGI:96885] | -0.47  | 0.0116  |
| <b>Tnfsf11</b>                         | tumor necrosis factor (ligand) superfamily, member 11 [Source:MGI Symbol;Acc:MGI:104798]      | -0.51  | 0.03155 |
| <b>Ticam1</b>                          | toll-like receptor adaptor molecule 1 [Source:MGI Symbol;Acc:MGI:2147032]                     | -0.41  | 0.01568 |

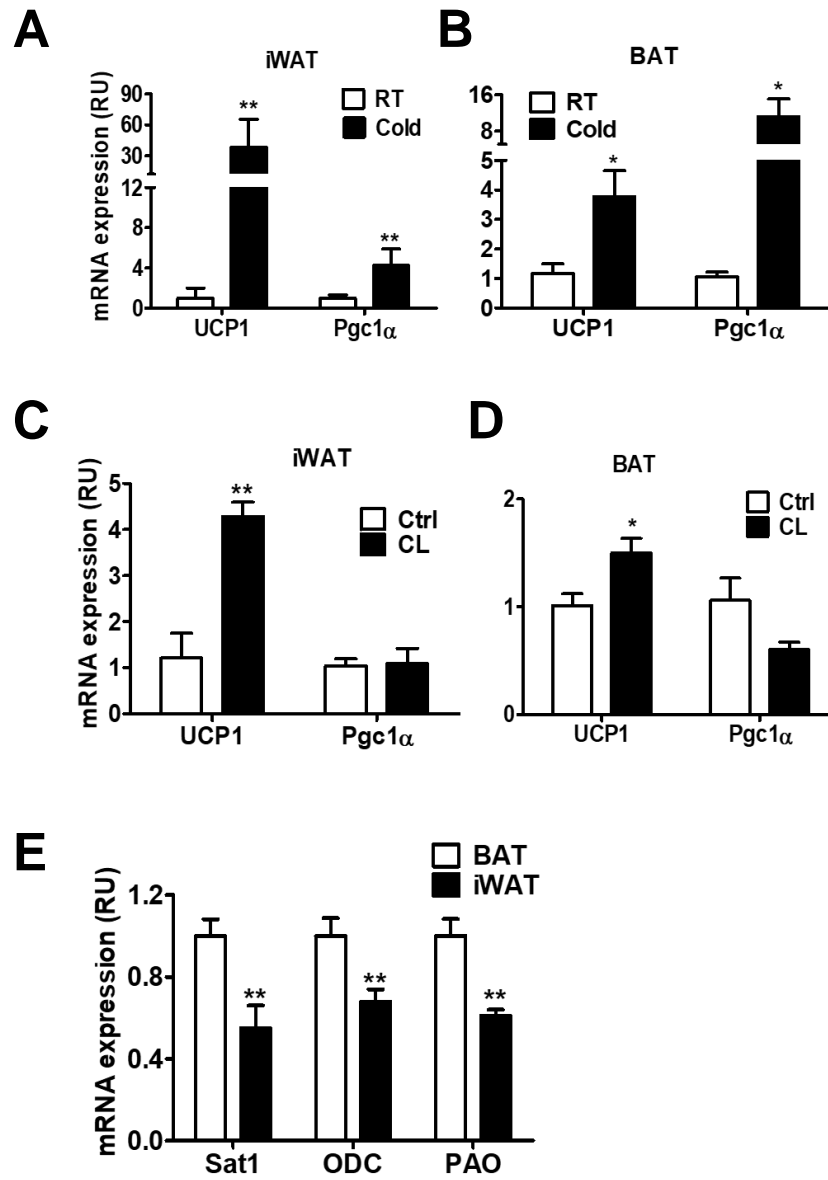

**Supplementary Fig. 1.** (A-D) UCP1 and Pgc-1 $\alpha$  mRNA levels in inguinal (iWAT) and brown (BAT) adipose tissue of cold-challenged (A-B) and CL-316,243-treated mice (C-D). (E) Relative mRNA expression of SAT1, ODC and APAOX in iWAT and BAT of wide type mice at room temperature. n=5-10 per group, \* p<0.05, \*\* p<0.01 vs controls (Ctrl).

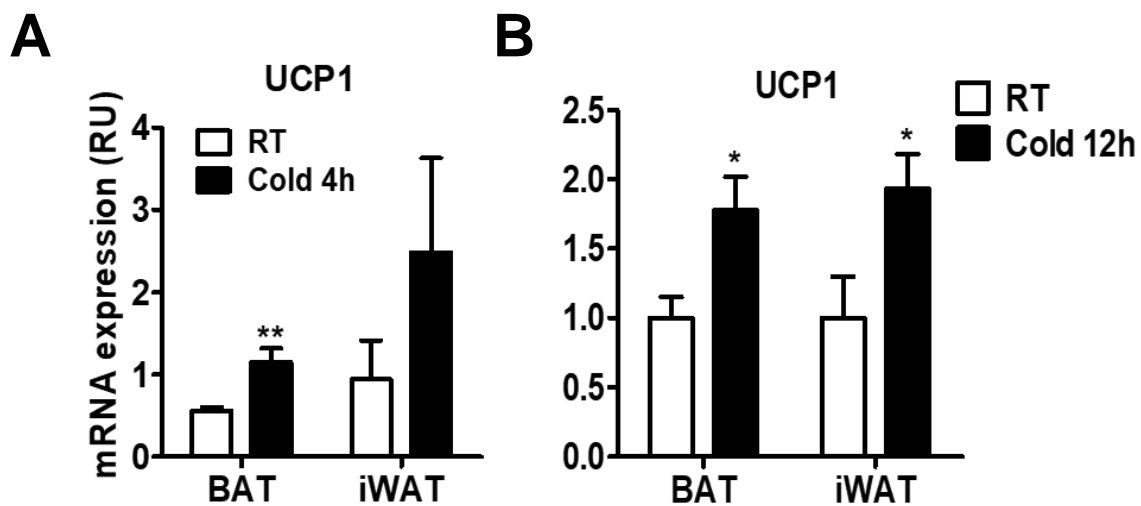

**Supplementary Fig. 2.** UCP1 mRNA levels in inguinal (iWAT) (A) and brown (BAT) (B) adipose tissue of mice challenged with cold (5°C) acutely for 4 hrs or 12 hrs. n=5-6 per group, \*p<0.05, \*\*p<0.01 vs controls (Ctrl).

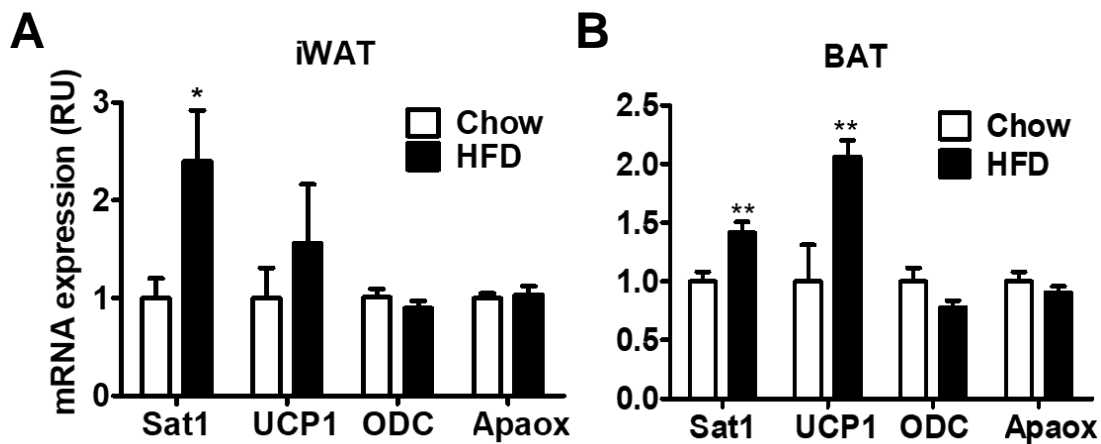

**Supplementary Fig. 3.** mRNA expression of SAT1, UCP1, ODC and APAOX in inguinal (iWAT) (A) and brown (BAT) (B) adipose tissue of mice fed a high fat diet (HFD) for 1 week. n=5 per group, \*p<0.05, \*\* p<0.01 vs chow diet.

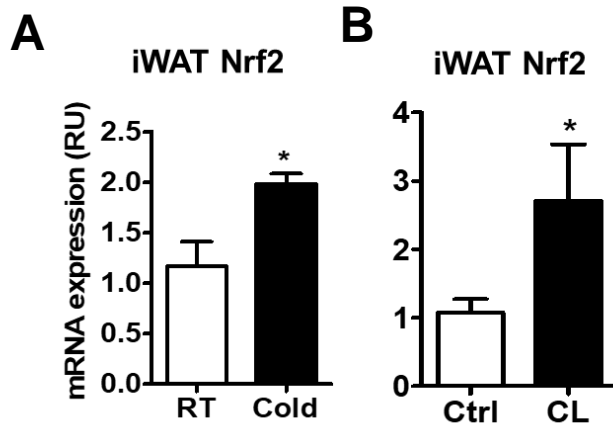

**Supplementary Fig. 4.** Nuclear factor (erythroid-derived 2)-like 2 (Nrf2) expression in iWAT of cold (A) and CL-316,243 (B) treated mice. n=5 per group, \*p<0.05 vs room temperature (RT) or control vector (Ctrl).

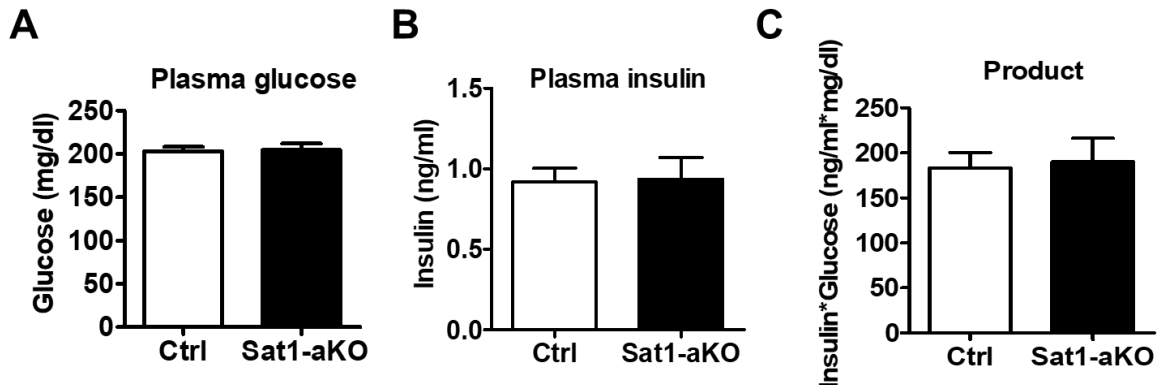

**Supplementary Fig. 5.** Plasma glucose (A), insulin (B) and insulin x glucose product (C) in control and SAT1-aKO mice fed a HFD for 30 weeks. n=9-15 per group.

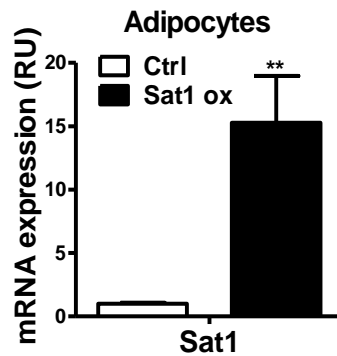

**Supplementary Fig. 6.** SAT1 levels in adipocytes with lentiviral SAT1 overexpression. n=6 per group, \*\*p<0.01 vs controls (Ctrl).

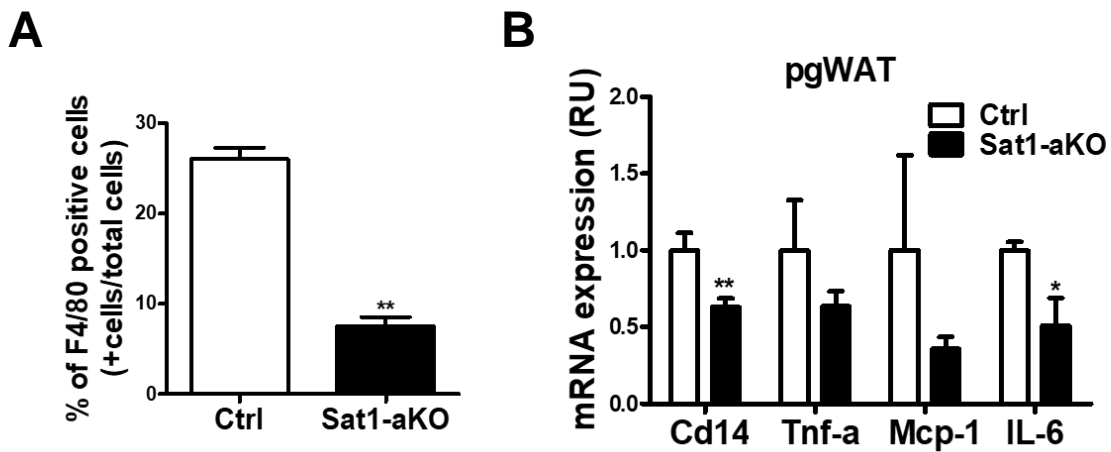

**Supplementary Fig. 7.** (A) Percent of F4/80-positive macrophages in stromal vascular fraction cells in adipose tissue sections of cold-challenged SAT1-aKO and control mice. (B) Inflammation-related gene expression (Cd14, Tnf- $\alpha$ , Mcp-1, IL-6) in perigonadal white adipose tissue (pgWAT) of cold-challenged SAT1-aKO and control mice. n=4-6 per group, \*p<0.05, \*\*p<0.01 vs Controls (Ctrl).

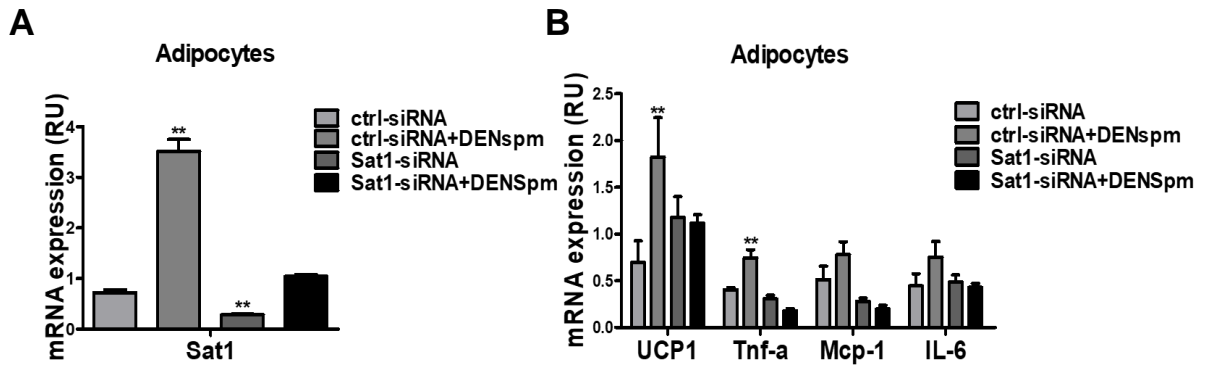

**Supplementary Fig. 8.** (A) Expression of SAT1 and (B) expression of UCP1 and inflammation-related genes in DENspm-treated adipocytes with or without SAT1 siRNA knockdown. n=4-6 per group, \*p<0.05, \*\*p<0.01 vs controls (Ctrl-siRNA).
